# Supplementary material
Source: MDPI journal article supplement (https://www.mdpi.com/2076-3417/12/17/8393)
Supplement: s1 [file s1]

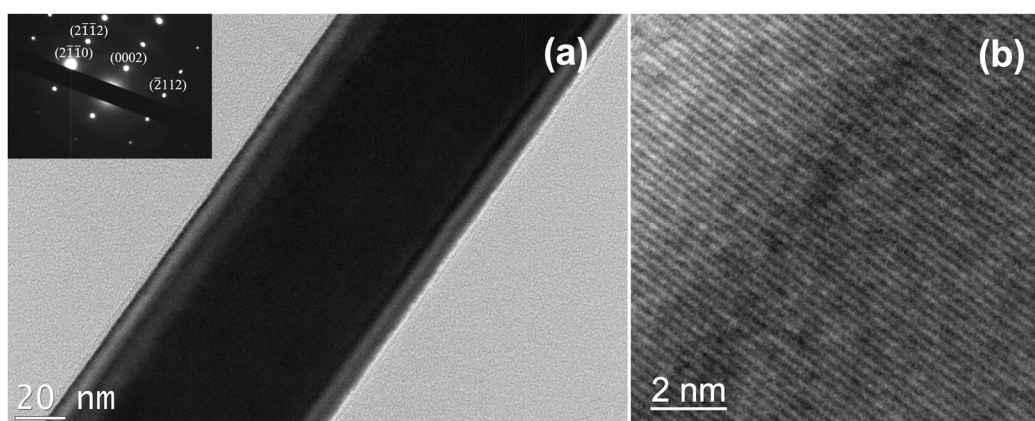

**Figure S1.** (a) Low-magnification bright-field transmission electron microscope (TEM) image of a ZnO NW with an inset for the corresponding SAED pattern. (b) High-resolution TEM image of a ZnO NW.

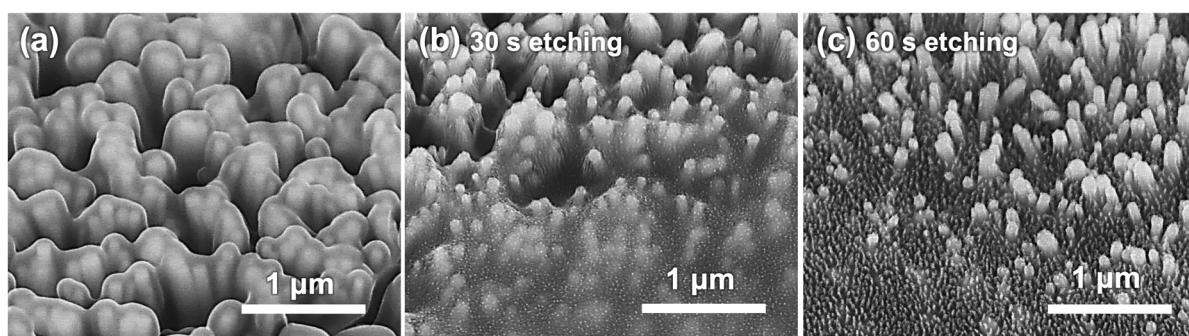

**Figure S2.** Field emission scanning electron microscope (FESEM) images of (a) ZnO nanowires (NWs) coated by AZ1512, and exposed tips of ZnO NWs after RIE etching for (b) 30 s and (c) 60 s, respectively.
